# Supplementary material for: Airway Microbial Community Turnover Differs by BPD Severity in Ventilated Preterm Infants
Source: PubMed Central journal article supplement (PMC5271346; doi:10.1371/journal.pone.0170120), 2017-01-27

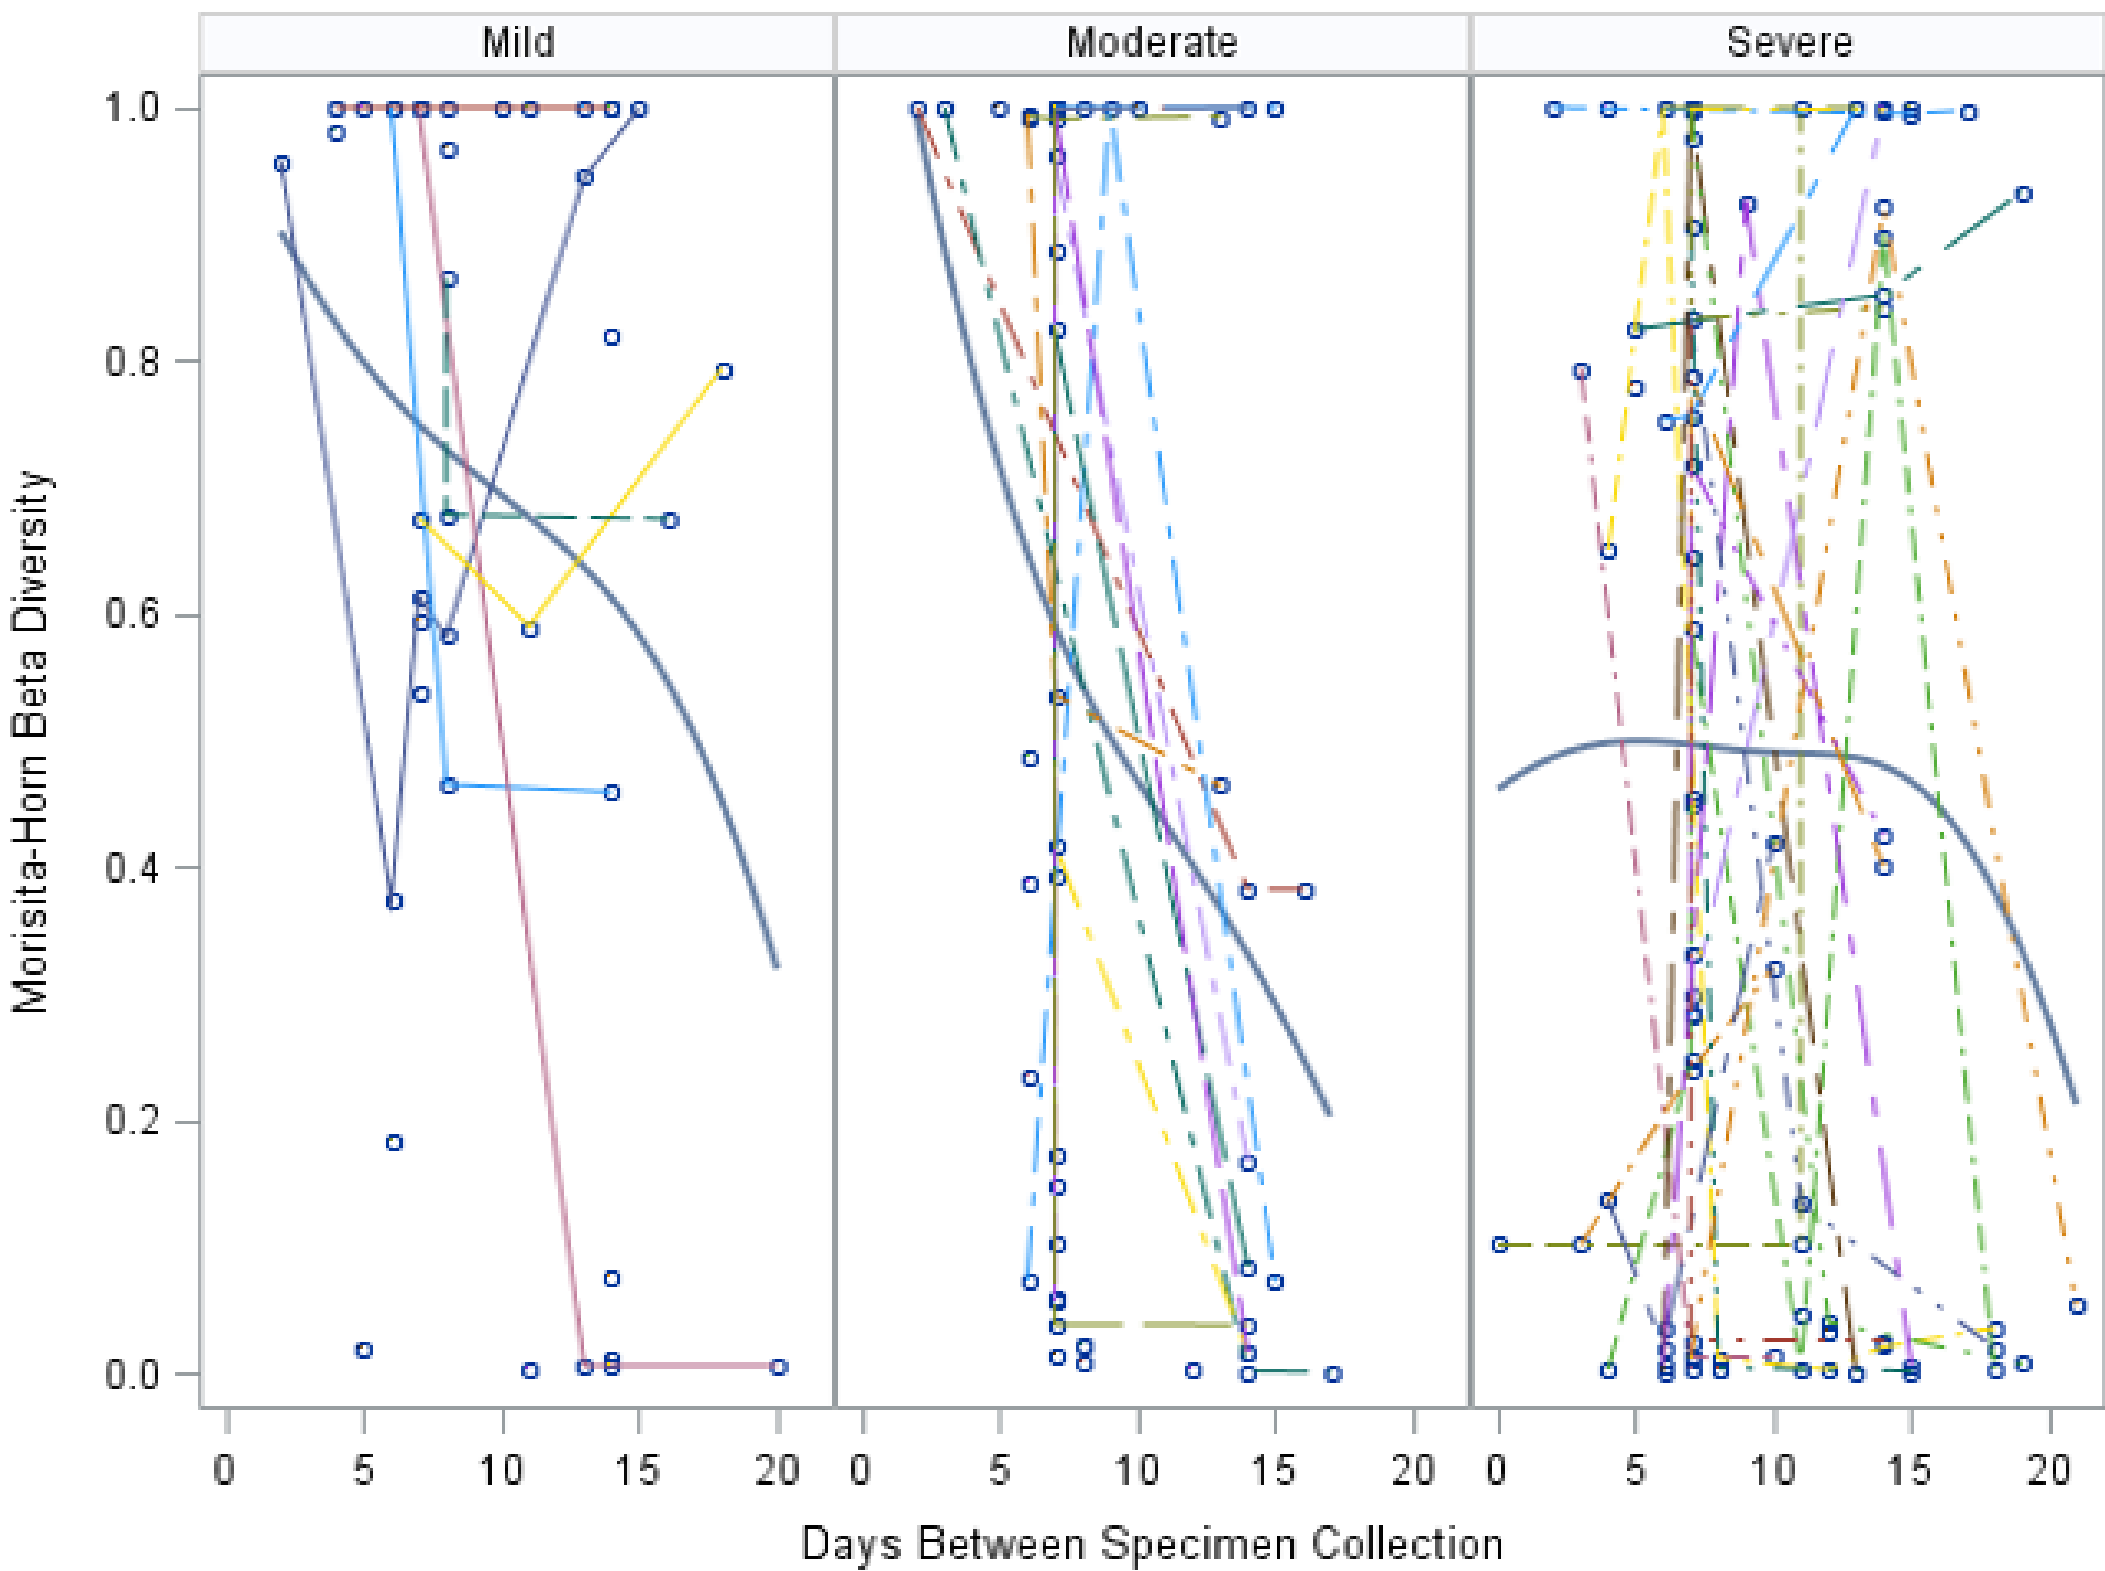

Supplement: pone.0170120.s007.pdf [file pone.0170120.s007.pdf]
